# Supplementary material for: Identification and Characterization of Glycine Decarboxylase as a Direct Target of Snail in the Epithelial–Mesenchymal Transition of Cancer Cells
Source: PubMed Central journal article supplement (PMC8049539; doi:10.4103/tme.tme_8_18), 2019-02-04
Supplement: NIHMS1061557-supplement-1.pdf [file NIHMS1061557-supplement-1.pdf]

## Supplement Table

**Table S1: Quantitative polymerase chain reaction primer for human gene**

| <b>Gene</b> | <b>Forward sequence</b> | <b>Reverse sequence</b> |
|-------------|-------------------------|-------------------------|
| GLDC        | ACCAATGGGGTGTGTTGAAGA   | CAGATTCCCACCTGAGCATT    |
| AMT         | TGGTTGGAGACATTGCAGAG    | AGCGTTGGACACCACATACA    |
| GCDH        | CTCCCTGAAGTTGGGACAAA    | CCTGGATTTCTGCAAGAGC     |
| DLD         | GGTTGGCAAATCAGAAGAGC    | GGATCTCACCATGCCATCT     |
| CDH1        | TGGACAGGGAGGATTTGAG     | GGCGTTGTCATTCACATCAG    |
| CDH2        | TGCACAGATGTGGACAGGAT    | CCACAAACATCAGCACAAGG    |
| SNAI1       | CTCTAGGCCCTGGCTGCTAC    | TGACATCTGAGTGGGTCTGG    |
| SNAI2       | TTCGGACCCACACATTACCT    | GCAGTGAGGGCAAGAAAAAG    |
| GAPDH       | CTCTGCTCCTCTGTTTCGAC    | GCGCCCAATACGACCAAATC    |

GLDC: Glycine decarboxylase
